# Supplementary material for: Approaching actinide(+III) hydration from first principles
Source: Royal Society of Chemistry journal article supplement (doi:10.1039/b614092k), 2006-12-06
Supplement: b614092k1.pdf [file b614092k1.pdf]

# A. ELECTRONIC SUPPLEMENTARY INFORMATION

*Approaching actinide (III) hydration from first principles.*

J. Wiebke, A. Moritz, X. Cao, M. Dolg,  
Phys. Chem. Chem. Phys. 9 (2007) 459–465.

Electronic supplementary material includes:

- Optimized  $[\text{An}^{\text{III}}(\text{OH}_2)_h]^{3+}$  ( $h = 7, 8, 9$ ) and  $[\text{An}^{\text{III}}(\text{OH}_2)_{h-1} \cdot \text{OH}_2]^{3+}$  ( $h = 8, 9$ ) molecular structures as `.xyz` files.
- $\text{An}^{\text{III}}$  atomic ion total energies (tab. A.1).
- Free  $\text{OH}_2$  ligand total gas phase energy, total COSMO SCRF energy, and ZPE (tab. A.1).
- $[\text{An}^{\text{III}}(\text{OH}_2)_h]^{3+}$  ( $h = 7, 8, 9$ ) total gas phase and total COSMO SCRF energies (tab.s A.2, A.3, A.4).  
 $[\text{An}^{\text{III}}(\text{OH}_2)_{h-1} \cdot \text{OH}_2]^{3+}$  ( $h = 8, 9$ ) total gas phase and total COSMO SCRF energies (tab.s A.5, A.6).
- $[\text{An}^{\text{III}}(\text{OH}_2)_h]^{3+}$  ( $h = 7, 8, 9$ ) ZPEs, entropies  $S^\circ$ , and mean  $\text{An}^{\text{III}}$ , O, H Mulliken net charges  $q_{\text{An}^{\text{III}}}$ ,  $q_{\text{O}}$ ,  $q_{\text{H}}$ , and  $\text{An}^{\text{III}}$  Mulliken 5f populations  $n_{\text{An}^{\text{III}}}^{5f}$  (tab.s A.7, A.8, A.9).  
 $[\text{An}^{\text{III}}(\text{OH}_2)_{h-1} \cdot \text{OH}_2]^{3+}$  ( $h = 8, 9$ ) ZPEs, entropies  $S^\circ$ ,  $\text{An}^{\text{III}}$  Mulliken net charges and Mulliken 5f populations  $n_{\text{An}^{\text{III}}}^{5f}$ , and O and H Mulliken net charges  $q_{\text{O}}$  and  $q_{\text{H}}$  for the 1<sup>st</sup> hydration sphere  $\text{OH}_2$  ligands that coordinate the single 2<sup>nd</sup> hydration sphere  $\text{OH}_2$  ligand (tab.s A.10, A.11).

`.xyz` files are named according to fig. 2 in the paper and the corresponding actinide element, *e.g.* `1ac.xyz` for  $[\text{Ac}^{\text{III}}(\text{OH}_2)_7]^{3+}$ , `2th.xyz` for  $[\text{Th}^{\text{III}}(\text{OH}_2)_8]^{3+}$ , *...* All `.xyz` files will be found in the `xyz.zip` archive.

Note that some structure visualization programs will not support actinide elements! In this case you will have to replace the actinide element by *e.g.* lanthanum in the corresponding `.xyz` files manually.

Table A.1.: An<sup>III</sup> atomic ion total energies, in a.u.

|    | BP86-DFT<br>An <sup>III</sup> : [6s5p4d2f] | BP86-DFT<br>An <sup>III</sup> : [6s5p4d2f1g] | MP2<br>An <sup>III</sup> : [6s5p4d2f] | HF<br>An <sup>III</sup> : [6s5p4d2f] |
|----|--------------------------------------------|----------------------------------------------|---------------------------------------|--------------------------------------|
| Ac | -28.2645689499                             | -28.2645689499                               | -28.0788227139                        | -27.9141245879                       |
| Th | -29.0092998197                             | -29.0092998197                               | -28.8250380942                        | -28.6588473303                       |
| Pa | -29.7229190823                             | -29.7229190823                               | -29.5378206972                        | -29.3723596279                       |
| U  | -30.4108378387                             | -30.4108378382                               | -30.2238973250                        | -30.0611438983                       |
| Np | -31.0795132347                             | -31.0795132346                               | -30.8894791046                        | -30.7305751909                       |
| Pu | -31.7332875414                             | -31.7332875414                               | -31.5432114478                        | -31.3845121364                       |
| Am | -32.3742753746                             | -32.3742753747                               | -32.1897828938                        | -32.0258208559                       |
| Cm | -33.0041682416                             | -33.0041682416                               | -32.8267712403                        | -32.6568462385                       |
| Bk | -33.6293502263                             | -33.6293502262                               | -33.4551644290                        | -33.2804538293                       |
| Cf | -34.2449273184                             | -34.2449273183                               | -34.0748015042                        | -33.8971794581                       |
| Es | -34.8592452170                             | -34.8592452171                               | -34.6899850187                        | -34.5099333993                       |
| Fm | -35.4705453280                             | -35.4705453282                               | -35.3013732786                        | -35.1195520656                       |
| Md | -36.0761076952                             | -36.0761076952                               | -35.9097068240                        | -35.7263308929                       |
| No | -36.6833877140                             | -36.6833877138                               | -36.5176006724                        | -36.3329073838                       |
| Lr | -37.2904768691                             | -37.2904768690                               | -37.1257450996                        | -36.9398209687                       |

free OH<sub>2</sub> system (ZPE: 0.0206953 a.u.)

|                          | BP86-DFT<br>O, H: aug-cc-pVDZ | BP86-DFT<br>O, H: cc-pVQZ | MP2<br>O, H: aug-cc-pVDZ | HF<br>O, H: aug-cc-pVDZ |
|--------------------------|-------------------------------|---------------------------|--------------------------|-------------------------|
| gas phase total energies |                               |                           |                          |                         |
| OH <sub>2</sub>          | -76.4492498605                | -76.4738516109            | -76.2607966147           | -76.0399725424          |
| COSMO total energies     |                               |                           |                          |                         |
| OH <sub>2</sub>          | -76.4599864235                | -76.4849883218            | -76.2723112995           | -76.0525018468          |

Table A.2.:  $[\text{An}^{\text{III}}(\text{OH}_2)_7]^{3+}$  total energies, in a.u.

|                          | BP86-DFT<br>An <sup>III</sup> : [6s5p4d2f]<br>O, H: aug-cc-pVDZ | BP86-DFT<br>An <sup>III</sup> : [6s5p4d2f1g]<br>O, H: cc-pVQZ | MP2<br>An <sup>III</sup> : [6s5p4d2f]<br>O, H: aug-cc-pVDZ | HF<br>An <sup>III</sup> : [6s5p4d2f]<br>O, H: aug-cc-pVDZ |
|--------------------------|-----------------------------------------------------------------|---------------------------------------------------------------|------------------------------------------------------------|-----------------------------------------------------------|
| gas phase total energies |                                                                 |                                                               |                                                            |                                                           |
| Ac                       | -564.0322983481                                                 | -564.2193273348                                               | -562.5421728398                                            | -560.7962411591                                           |
| Th                       | -564.7901369775                                                 | -564.9770777319                                               | -563.3026583788                                            | -561.5548250565                                           |
| Pa                       | -565.5167103326                                                 | -565.7035330244                                               | -564.0289169410                                            | -562.2811187999                                           |
| U                        | -566.2174500468                                                 | -566.4041826964                                               | -564.7283669629                                            | -562.9823267670                                           |
| Np                       | -566.8983649492                                                 | -567.0850313058                                               | -565.4067752678                                            | -563.6635736877                                           |
| Pu                       | -567.5637657357                                                 | -567.7503740998                                               | -566.0714014550                                            | -564.3287419099                                           |
| Am                       | -568.2159859356                                                 | -568.4025702846                                               | -566.7279508650                                            | -564.9809711930                                           |
| Cm                       | -568.8569971329                                                 | -569.0435845447                                               | -567.3755703762                                            | -565.6228035411                                           |
| Bk                       | -569.4919574975                                                 | -569.6785502228                                               | -568.0137734298                                            | -566.2560372510                                           |
| Cf                       | -570.1179990942                                                 | -570.3046065974                                               | -568.6439515833                                            | -566.8829842759                                           |
| Es                       | -570.7414287924                                                 | -570.9280401708                                               | -569.2683883965                                            | -567.5047829612                                           |
| Fm                       | -571.3614407115                                                 | -571.5480812412                                               | -569.8886286038                                            | -568.1230684160                                           |
| Md                       | -571.9768170473                                                 | -572.1634529085                                               | -570.5069043686                                            | -568.7395322605                                           |
| No                       | -572.5928684325                                                 | -572.7795084819                                               | -571.1237582374                                            | -569.3548422460                                           |
| Lr                       | -573.2087530404                                                 | -573.3954004387                                               | -571.7408600804                                            | -569.9704467772                                           |
| COSMO total energies     |                                                                 |                                                               |                                                            |                                                           |
| Ac                       | -564.6549376626                                                 | -564.8411970742                                               | -563.1668625175                                            | -561.4193817314                                           |
| Th                       | -565.4154675645                                                 | -565.6016584617                                               | -563.9301001815                                            | -562.1807943124                                           |
| Pa                       | -566.1438155580                                                 | -566.3299129037                                               | -564.6581099928                                            | -562.9088800788                                           |
| U                        | -566.8389481717                                                 | -567.0250797639                                               | -565.3509067933                                            | -563.6031217389                                           |
| Np                       | -567.5294354812                                                 | -567.7154211970                                               | -566.0399472913                                            | -564.2953534672                                           |
| Pu                       | -568.1958352627                                                 | -568.3817848033                                               | -566.7054702687                                            | -564.9614229794                                           |
| Am                       | -568.8489479920                                                 | -569.0348963257                                               | -567.3627874856                                            | -565.6144127608                                           |
| Cm                       | -569.4910587277                                                 | -569.6770295924                                               | -568.0113821538                                            | -566.2572136189                                           |
| Bk                       | -570.1269233755                                                 | -570.3129144392                                               | -568.6503847213                                            | -566.8912365128                                           |
| Cf                       | -570.7545080528                                                 | -570.9405273259                                               | -569.2820471098                                            | -567.5196672699                                           |
| Es                       | -571.3786071503                                                 | -571.5646456096                                               | -569.9070366399                                            | -568.1420046513                                           |
| Fm                       | -571.9999381461                                                 | -572.1860164158                                               | -570.5285680705                                            | -568.7615815309                                           |
| Md                       | -572.6163113301                                                 | -572.8024000208                                               | -571.1477517871                                            | -569.3789407820                                           |
| No                       | -573.2333238412                                                 | -573.4194314479                                               | -571.7654923827                                            | -569.9951226726                                           |
| Lr                       | -573.8502094760                                                 | -574.0363397411                                               | -572.3835194170                                            | -570.6116400117                                           |

Table A.3.:  $[\text{An}^{\text{III}}(\text{OH}_2)_8]^{3+}$  total energies, in a.u.

|                      | BP86-DFT<br>An <sup>III</sup> : [6s5p4d2f]<br>O, H: aug-cc-pVDZ | BP86-DFT<br>An <sup>III</sup> : [6s5p4d2f1g]<br>O, H: cc-pVQZ | MP2<br>An <sup>III</sup> : [6s5p4d2f]<br>O, H: aug-cc-pVDZ | HF<br>An <sup>III</sup> : [6s5p4d2f]<br>O, H: aug-cc-pVDZ |
|----------------------|-----------------------------------------------------------------|---------------------------------------------------------------|------------------------------------------------------------|-----------------------------------------------------------|
| gas phase energies   |                                                                 |                                                               |                                                            |                                                           |
| Ac                   | -640.5272794757                                                 | -640.7407151084                                               | -638.8580277321                                            | -636.8855012194                                           |
| Th                   | -641.2853876723                                                 | -641.4987432252                                               | -639.6189556991                                            | -637.6443528393                                           |
| Pa                   | -642.0120433364                                                 | -642.2253211350                                               | -640.3456022387                                            | -638.3709087829                                           |
| U                    | -642.7128434547                                                 | -642.9260411744                                               | -641.0454428623                                            | -639.0722551629                                           |
| Np                   | -643.3938801964                                                 | -643.6069794322                                               | -641.7242100999                                            | -639.7535653019                                           |
| Pu                   | -644.0592215924                                                 | -644.2722942668                                               | -642.3889097230                                            | -640.4187843615                                           |
| Am                   | -644.7114648474                                                 | -644.9240786675                                               | -643.0452765963                                            | -641.0709975503                                           |
| Cm                   | -645.3523044384                                                 | -645.5653460971                                               | -643.6927250433                                            | -641.7127640699                                           |
| Bk                   | -645.9872320307                                                 | -646.2002339240                                               | -644.3308580958                                            | -642.3458914329                                           |
| Cf                   | -646.6131165028                                                 | -646.8261249966                                               | -644.9609016727                                            | -642.9725665036                                           |
| Es                   | -647.2363393933                                                 | -647.4493731470                                               | -645.5852596792                                            | -643.5943005023                                           |
| Fm                   | -647.8562226534                                                 | -648.0692452091                                               | -646.2053571802                                            | -644.2123719197                                           |
| Md                   | -648.4713446842                                                 | -648.6841969582                                               | -646.8234330126                                            | -644.8285684761                                           |
| No                   | -649.0871759946                                                 | -649.3000431211                                               | -647.4400553332                                            | -645.4435595108                                           |
| Lr                   | -649.7027066011                                                 | -649.9157139950                                               | -648.0569095324                                            | -646.0588966793                                           |
| COSMO total energies |                                                                 |                                                               |                                                            |                                                           |
| Ac                   | -641.1257314971                                                 | -641.3384300510                                               | -639.4572612526                                            | -637.4829651990                                           |
| Th                   | -641.8896953914                                                 | -642.1022503269                                               | -640.2246321698                                            | -638.2483922682                                           |
| Pa                   | -642.6178665842                                                 | -642.8303646611                                               | -640.9527255927                                            | -638.9764071894                                           |
| U                    | -643.3203352469                                                 | -643.5327715222                                               | -641.6541789573                                            | -639.6793753981                                           |
| Np                   | -644.0033058132                                                 | -644.2156559420                                               | -642.3348178035                                            | -640.3625359616                                           |
| Pu                   | -644.6702066622                                                 | -644.8825431686                                               | -643.0010247485                                            | -641.0292679959                                           |
| Am                   | -645.3240340644                                                 | -645.5363196855                                               | -643.6589255025                                            | -641.6830208658                                           |
| Cm                   | -645.9662971909                                                 | -646.1786279504                                               | -644.3077374021                                            | -642.3261501377                                           |
| Bk                   | -646.6026258369                                                 | -646.8149253314                                               | -644.9472302693                                            | -642.9606380626                                           |
| Cf                   | -647.2299180912                                                 | -647.4422345527                                               | -645.5786413820                                            | -643.5886771381                                           |
| Es                   | -647.8544520368                                                 | -648.0668053781                                               | -646.2042730918                                            | -644.2116828019                                           |
| Fm                   | -648.4755386459                                                 | -648.6878912791                                               | -646.8255379720                                            | -644.8309173859                                           |
| Md                   | -649.0919875853                                                 | -649.3043513179                                               | -647.4449019083                                            | -645.4484040710                                           |
| No                   | -649.7089075344                                                 | -649.9212772182                                               | -648.0625796407                                            | -646.0644483394                                           |
| Lr                   | -650.3256259483                                                 | -650.5380024412                                               | -648.6805900284                                            | -646.6809378314                                           |

Table A.4.:  $[\text{An}^{\text{III}}(\text{OH}_2)_9]^{3+}$  total energies, in a.u.

|                      | BP86-DFT<br>An <sup>III</sup> : [6s5p4d2f]<br>O, H: aug-cc-pVDZ | BP86-DFT<br>An <sup>III</sup> : [6s5p4d2f1g]<br>O, H: cc-pVQZ | MP2<br>An <sup>III</sup> : [6s5p4d2f]<br>O, H: aug-cc-pVDZ | HF<br>An <sup>III</sup> : [6s5p4d2f]<br>O, H: aug-cc-pVDZ |
|----------------------|-----------------------------------------------------------------|---------------------------------------------------------------|------------------------------------------------------------|-----------------------------------------------------------|
| gas phase energies   |                                                                 |                                                               |                                                            |                                                           |
| Ac                   | -717.0115526199                                                 | -717.2512495626                                               | -715.1638328626                                            | -712.9639491789                                           |
| Th                   | -717.7693698363                                                 | -718.0090014867                                               | -715.9244187222                                            | -713.7227010150                                           |
| Pa                   | -718.4957779303                                                 | -718.7353092904                                               | -716.6510674110                                            | -714.4486012382                                           |
| U                    | -719.1961775383                                                 | -719.4356210473                                               | -717.3507103259                                            | -715.1494562396                                           |
| Np                   | -719.8766796229                                                 | -720.1160484072                                               | -718.0292605315                                            | -715.8303400366                                           |
| Pu                   | -720.5415944316                                                 | -720.7808827417                                               | -718.6934140219                                            | -716.4949006223                                           |
| Am                   | -721.1932564328                                                 | -721.4320977782                                               | -719.3490334675                                            | -717.1465889716                                           |
| Cm                   | -721.8336386587                                                 | -722.0728630661                                               | -719.9958084726                                            | -717.7877953121                                           |
| Bk                   | -722.4679321624                                                 | -722.7071372108                                               | -720.6333267779                                            | -718.4202709690                                           |
| Cf                   | -723.0932275825                                                 | -723.3324182817                                               | -721.2627841061                                            | -719.0463992549                                           |
| Es                   | -723.7159127660                                                 | -723.9551148307                                               | -721.8864982811                                            | -719.6673135663                                           |
| Fm                   | -724.3351682593                                                 | -724.5743610581                                               | -722.5059938721                                            | -720.2847514105                                           |
| Md                   | -724.9496451757                                                 | -725.1886925854                                               | -723.1232906360                                            | -720.9002979420                                           |
| No                   | -725.5648297604                                                 | -725.8038782626                                               | -723.7393087841                                            | -721.5145537289                                           |
| Lr                   | -726.1797913185                                                 | -726.4189554927                                               | -724.3554650706                                            | -722.1290845129                                           |
| COSMO total energies |                                                                 |                                                               |                                                            |                                                           |
| Ac                   | -717.5971755471                                                 | -717.8360638940                                               | -715.7501509931                                            | -713.5485479406                                           |
| Th                   | -718.3566430468                                                 | -718.5954761485                                               | -716.5123651555                                            | -714.3089348127                                           |
| Pa                   | -719.0853039330                                                 | -719.3240478379                                               | -717.2412407177                                            | -715.0370651513                                           |
| U                    | -719.7875757834                                                 | -720.0262436909                                               | -717.9427368930                                            | -715.7397800318                                           |
| Np                   | -720.4698386066                                                 | -720.7084430695                                               | -718.6230272167                                            | -716.4224109043                                           |
| Pu                   | -721.1364578514                                                 | -721.3749933040                                               | -719.2888747478                                            | -717.0886702887                                           |
| Am                   | -721.7896532557                                                 | -722.0281366666                                               | -719.9460013717                                            | -717.7418708198                                           |
| Cm                   | -722.4317100785                                                 | -722.6701983799                                               | -720.5944415768                                            | -718.3847458650                                           |
| Bk                   | -723.0674135328                                                 | -723.3058892270                                               | -721.2333560331                                            | -719.0186220370                                           |
| Cf                   | -723.6941765513                                                 | -723.9326447364                                               | -721.8642688916                                            | -719.6462083083                                           |
| Es                   | -724.3181034500                                                 | -724.5565887223                                               | -722.4892127430                                            | -720.2683540955                                           |
| Fm                   | -724.9385562584                                                 | -725.1770338837                                               | -723.1098938637                                            | -720.8869745897                                           |
| Md                   | -725.5541523466                                                 | -725.7926490371                                               | -723.7282984541                                            | -721.5036259632                                           |
| No                   | -726.1706460732                                                 | -726.4091345407                                               | -724.3456162039                                            | -722.1191819386                                           |
| Lr                   | -726.7872523595                                                 | -727.0257087308                                               | -724.9633983654                                            | -722.7353055051                                           |

Table A.5.:  $[\text{An}^{\text{III}}(\text{OH}_2)_7 \cdot \text{OH}_2]^{3+}$  total energies, in a.u.

|                      | BP86-DFT<br>An <sup>III</sup> : [6s5p4d2f]<br>O, H: aug-cc-pVDZ | BP86-DFT<br>An <sup>III</sup> : [6s5p4d2f1g]<br>O, H: cc-pVQZ | MP2<br>An <sup>III</sup> : [6s5p4d2f]<br>O, H: aug-cc-pVDZ | HF<br>An <sup>III</sup> : [6s5p4d2f]<br>O, H: aug-cc-pVDZ |
|----------------------|-----------------------------------------------------------------|---------------------------------------------------------------|------------------------------------------------------------|-----------------------------------------------------------|
| gas phase energies   |                                                                 |                                                               |                                                            |                                                           |
| Ac                   | -640.5318416364                                                 | -640.7447152849                                               | -638.8538056941                                            | -636.8763040691                                           |
| Th                   | -641.2900534608                                                 | -641.5028360377                                               | -639.6146754683                                            | -637.6352313844                                           |
| Pa                   | -642.0169969475                                                 | -642.2296504725                                               | -640.3412806360                                            | -638.3618398330                                           |
| U                    | -642.7180977463                                                 | -642.9306527415                                               | -641.0410816119                                            | -639.0633360106                                           |
| Np                   | -643.3993798892                                                 | -643.6118549347                                               | -641.7198473431                                            | -639.7448974384                                           |
| Pu                   | -644.0651270766                                                 | -644.2775262816                                               | -642.3847910100                                            | -640.4103473153                                           |
| Am                   | -644.7176787735                                                 | -644.9300381834                                               | -643.0416280967                                            | -641.0628318830                                           |
| Cm                   | -645.3590162485                                                 | -645.5713618476                                               | -643.6895359356                                            | -641.7049587475                                           |
| Bk                   | -645.9942487313                                                 | -646.2065903861                                               | -644.3280015626                                            | -642.3384347520                                           |
| Cf                   | -646.6205970502                                                 | -646.8329319776                                               | -644.9584706921                                            | -642.9656701248                                           |
| Es                   | -647.2442728022                                                 | -647.4566083072                                               | -645.5831500521                                            | -643.5876559842                                           |
| Fm                   | -647.8645379784                                                 | -648.0768727083                                               | -646.2036506940                                            | -644.2061721311                                           |
| Md                   | -648.4801727148                                                 | -648.6924989069                                               | -646.8221866893                                            | -644.8228752787                                           |
| No                   | -649.0964652245                                                 | -649.3087812760                                               | -647.4392762576                                            | -645.4384051042                                           |
| Lr                   | -649.7125764645                                                 | -649.9248987872                                               | -648.0565918683                                            | -646.0542369946                                           |
| COSMO total energies |                                                                 |                                                               |                                                            |                                                           |
| Ac                   | -641.1245260726                                                 | -641.3365982213                                               | -639.4483358660                                            | -637.4691328524                                           |
| Th                   | -641.8842958770                                                 | -642.0963021433                                               | -640.2107074516                                            | -638.2295868389                                           |
| Pa                   | -642.6126183263                                                 | -642.8245162183                                               | -640.9386374789                                            | -638.9575342248                                           |
| U                    | -643.3150964290                                                 | -643.5269157083                                               | -641.6397653025                                            | -639.6603709689                                           |
| Np                   | -643.9989039080                                                 | -644.2106373433                                               | -642.3211785939                                            | -640.3446214862                                           |
| Pu                   | -644.6658815527                                                 | -644.8775586542                                               | -642.9872890576                                            | -641.0112427829                                           |
| Am                   | -645.3197597151                                                 | -645.5314114747                                               | -643.6454028466                                            | -641.6650134573                                           |
| Cm                   | -645.9623771435                                                 | -646.1740316697                                               | -644.2945298618                                            | -642.3083627103                                           |
| Bk                   | -646.5987392686                                                 | -646.8104009804                                               | -644.9340826525                                            | -642.9429246468                                           |
| Cf                   | -647.2255964608                                                 | -647.4372817337                                               | -645.5648936510                                            | -643.5705029053                                           |
| Es                   | -647.8504463680                                                 | -648.0621437684                                               | -646.1907189187                                            | -644.1936339886                                           |
| Fm                   | -648.4717397203                                                 | -648.6834451239                                               | -646.8122150791                                            | -644.8131472489                                           |
| Md                   | -649.0885487882                                                 | -649.3002567918                                               | -647.4318931127                                            | -645.4309940260                                           |
| No                   | -649.7058742460                                                 | -649.9175804150                                               | -648.0499840886                                            | -646.0475261782                                           |
| Lr                   | -650.3230364566                                                 | -650.5347596176                                               | -648.6683228009                                            | -646.6643803446                                           |

Table A.6.:  $[\text{An}^{\text{III}}(\text{OH}_2)_8 \cdot \text{OH}_2]^{3+}$  total energies, in a.u.

|                      | BP86-DFT<br>An <sup>III</sup> : [6s5p4d2f]<br>O, H: aug-cc-pVDZ | BP86-DFT<br>An <sup>III</sup> : [6s5p4d2f1g]<br>O, H: cc-pVQZ | MP2<br>An <sup>III</sup> : [6s5p4d2f]<br>O, H: aug-cc-pVDZ | HF<br>An <sup>III</sup> : [6s5p4d2f]<br>O, H: aug-cc-pVDZ |
|----------------------|-----------------------------------------------------------------|---------------------------------------------------------------|------------------------------------------------------------|-----------------------------------------------------------|
| gas phase energies   |                                                                 |                                                               |                                                            |                                                           |
| Ac                   | -717.0222580402                                                 | -717.2615562762                                               | -715.1638328626                                            | -712.9639491789                                           |
| Th                   | -717.7806340041                                                 | -718.0198486773                                               | -715.9244187222                                            | -713.7227010150                                           |
| Pa                   | -718.5075969712                                                 | -718.7466968030                                               | -716.6510674110                                            | -714.4486012382                                           |
| U                    | -719.2086537297                                                 | -719.4476700541                                               | -717.3507103259                                            | -715.1494562396                                           |
| Np                   | -719.8898381608                                                 | -720.1287783482                                               | -718.0292605315                                            | -715.8303400366                                           |
| Pu                   | -720.5554376583                                                 | -720.7943101312                                               | -718.6934140219                                            | -716.4949006223                                           |
| Am                   | -721.2078180479                                                 | -721.4466560430                                               | -719.3490334675                                            | -717.1465889716                                           |
| Cm                   | -721.8489435877                                                 | -722.0877666494                                               | -719.9958084726                                            | -717.7877953121                                           |
| Bk                   | -722.4839532339                                                 | -722.7227758885                                               | -720.6333267779                                            | -718.4202709690                                           |
| Cf                   | -723.1100240112                                                 | -723.3488486064                                               | -721.2627841061                                            | -719.0463992549                                           |
| Es                   | -723.7334340852                                                 | -723.9722653482                                               | -721.8864982811                                            | -719.6673135663                                           |
| Fm                   | -724.3534093127                                                 | -724.5922499318                                               | -722.5059938721                                            | -720.2847514105                                           |
| Md                   | -724.9686954208                                                 | -725.2075267068                                               | -723.1232906360                                            | -720.9002979420                                           |
| No                   | -725.5846463757                                                 | -725.8234767883                                               | -723.7393087841                                            | -721.5145537289                                           |
| Lr                   | -726.2003941658                                                 | -726.4392161004                                               | -724.3554650706                                            | -722.1290845129                                           |
| COSMO total energies |                                                                 |                                                               |                                                            |                                                           |
| Ac                   | -717.6000417410                                                 | -717.8423100791                                               | -715.7447407068                                            | -713.5394505783                                           |
| Th                   | -718.3600644612                                                 | -718.6021390736                                               | -716.5075082722                                            | -714.3001100926                                           |
| Pa                   | -719.0886996299                                                 | -719.3316833752                                               | -717.2360394222                                            | -715.0285243024                                           |
| U                    | -719.7914638583                                                 | -720.0363450301                                               | -717.9377836865                                            | -715.7317571833                                           |
| Np                   | -720.4742809767                                                 | -720.7176757746                                               | -718.6183763481                                            | -716.4148747809                                           |
| Pu                   | -721.1413802542                                                 | -721.3849830935                                               | -719.2847108360                                            | -717.0817279151                                           |
| Am                   | -721.7952366327                                                 | -722.0333179334                                               | -719.9426883531                                            | -717.7355434329                                           |
| Cm                   | -722.4378067717                                                 | -722.6758831948                                               | -720.5917390600                                            | -718.3789031300                                           |
| Bk                   | -723.0740893910                                                 | -723.3165512539                                               | -721.2312560976                                            | -719.0134340845                                           |
| Cf                   | -723.7015261555                                                 | -723.9438183443                                               | -721.8628778543                                            | -719.6417174450                                           |
| Es                   | -724.3259928028                                                 | -724.5682533351                                               | -722.4883538824                                            | -720.2645063979                                           |
| Fm                   | -724.9470818074                                                 | -725.1893023495                                               | -723.1096744257                                            | -720.8837862750                                           |
| Md                   | -725.5635924491                                                 | -725.8017131066                                               | -723.7290908366                                            | -721.5012870538                                           |
| No                   | -726.1807028118                                                 | -726.4188290757                                               | -724.3470203737                                            | -722.1176073657                                           |
| Lr                   | -726.7976537908                                                 | -727.0395920215                                               | -724.9651808373                                            | -722.7342215206                                           |

Table A.7.:  $[\text{An}^{\text{III}}(\text{OH}_2)_7]^{3+}$  ZPEs in a.u., entropies  $S^\circ$  in  $\text{kJ K}^{-1} \text{mol}^{-1}$ , mean  $\text{An}^{\text{III}}$ , O, H Mulliken net charges  $q_{\text{An}^{\text{III}}}$ ,  $q_{\text{O}}$ ,  $q_{\text{H}}$ , and  $\text{An}^{\text{III}}$  5f Mulliken populations  $n_{\text{An}^{\text{III}}}^{5\text{f}}$ .

|    | ZPE       | $S^\circ$ | $q_{\text{An}^{\text{III}}}$ | $n_{\text{An}^{\text{III}}}^{5\text{f}}$ | $q_{\text{O}}$ | $q_{\text{H}}$ |
|----|-----------|-----------|------------------------------|------------------------------------------|----------------|----------------|
| Ac | 0.1705798 | 0.62      | 1.95                         | 0.14                                     | -0.31          | 0.23           |
| Th | 0.1707299 | 0.61      | 1.93                         | 0.11                                     | -0.31          | 0.23           |
| Pa | 0.1708613 | 0.61      | 1.92                         | 0.09                                     | -0.32          | 0.24           |
| U  | 0.1710865 | 0.61      | 1.92                         | 0.08                                     | -0.32          | 0.24           |
| Np | 0.1712933 | 0.60      | 1.92                         | 0.08                                     | -0.32          | 0.24           |
| Pu | 0.1715774 | 0.60      | 1.92                         | 0.07                                     | -0.33          | 0.24           |
| Am | 0.1715976 | 0.59      | 1.94                         | 0.07                                     | -0.34          | 0.24           |
| Cm | 0.1717498 | 0.59      | 1.96                         | 0.06                                     | -0.34          | 0.25           |
| Bk | 0.1718795 | 0.59      | 1.98                         | 0.06                                     | -0.35          | 0.25           |
| Cf | 0.1719837 | 0.58      | 2.01                         | 0.06                                     | -0.36          | 0.25           |
| Es | 0.1721296 | 0.58      | 2.03                         | 0.06                                     | -0.36          | 0.25           |
| Fm | 0.1722105 | 0.58      | 2.05                         | 0.05                                     | -0.37          | 0.25           |
| Md | 0.1724054 | 0.58      | 2.09                         | 0.05                                     | -0.38          | 0.25           |
| No | 0.1725651 | 0.57      | 2.12                         | 0.05                                     | -0.39          | 0.26           |
| Lr | 0.1726641 | 0.57      | 2.16                         | 0.05                                     | -0.39          | 0.26           |

Table A.8.:  $[\text{An}^{\text{III}}(\text{OH}_2)_8]^{3+}$  ZPEs in a.u., entropies  $S^\circ$  in  $\text{kJ K}^{-1} \text{mol}^{-1}$ , mean  $\text{An}^{\text{III}}$ , O, H Mulliken net charges  $q_{\text{An}^{\text{III}}}$ ,  $q_{\text{O}}$ ,  $q_{\text{H}}$ , and  $\text{An}^{\text{III}}$  5f Mulliken populations  $n_{\text{An}^{\text{III}}}^{5\text{f}}$ .

|    | ZPE       | $S^\circ$ | $q_{\text{An}^{\text{III}}}$ | $n_{\text{An}^{\text{III}}}^{5\text{f}}$ | $q_{\text{O}}$ | $q_{\text{H}}$ |
|----|-----------|-----------|------------------------------|------------------------------------------|----------------|----------------|
| Ac | 0.1950423 | 0.66      | 0.95                         | 0.14                                     | -0.34          | 0.23           |
| Th | 0.1954356 | 0.65      | 0.94                         | 0.11                                     | -0.35          | 0.24           |
| Pa | 0.1955726 | 0.65      | 0.93                         | 0.10                                     | -0.35          | 0.24           |
| U  | 0.1957126 | 0.65      | 0.91                         | 0.08                                     | -0.35          | 0.24           |
| Np | 0.1961571 | 0.64      | 0.88                         | 0.08                                     | -0.36          | 0.24           |
| Pu | 0.1962281 | 0.63      | 0.86                         | 0.07                                     | -0.36          | 0.24           |
| Am | 0.1965359 | 0.63      | 0.82                         | 0.07                                     | -0.37          | 0.25           |
| Cm | 0.1966545 | 0.63      | 0.77                         | 0.06                                     | -0.37          | 0.25           |
| Bk | 0.1969403 | 0.62      | 0.71                         | 0.06                                     | -0.38          | 0.25           |
| Cf | 0.1968592 | 0.62      | 0.64                         | 0.06                                     | -0.39          | 0.25           |
| Es | 0.1971556 | 0.62      | 0.58                         | 0.06                                     | -0.40          | 0.25           |
| Fm | 0.1973633 | 0.61      | 0.51                         | 0.05                                     | -0.42          | 0.26           |
| Md | 0.1975285 | 0.61      | 0.42                         | 0.05                                     | -0.43          | 0.26           |
| No | 0.1975998 | 0.61      | 0.35                         | 0.05                                     | -0.44          | 0.26           |
| Lr | 0.1977131 | 0.61      | 0.27                         | 0.05                                     | -0.46          | 0.26           |

Table A.9.:  $[\text{An}^{\text{III}}(\text{OH}_2)_9]^{3+}$  ZPEs in a.u., entropies  $S^\circ$  in  $\text{kJ K}^{-1} \text{mol}^{-1}$ , mean  $\text{An}^{\text{III}}$ , O, H Mulliken net charges  $q_{\text{An}^{\text{III}}}$ ,  $q_{\text{O}}$ ,  $q_{\text{H}}$ , and  $\text{An}^{\text{III}}$  5f Mulliken populations  $n_{\text{An}^{\text{III}}}^{5\text{f}}$ .

|    | ZPE       | $S^\circ$ | $q_{\text{An}^{\text{III}}}$ | $n_{\text{An}^{\text{III}}}^{5\text{f}}$ | $q_{\text{O}}$ | $q_{\text{H}}$ |
|----|-----------|-----------|------------------------------|------------------------------------------|----------------|----------------|
| Ac | 0.2195926 | 0.70      | 0.82                         | 0.14                                     | -0.39          | 0.24           |
| Th | 0.2197343 | 0.71      | 0.83                         | 0.11                                     | -0.39          | 0.24           |
| Pa | 0.2199736 | 0.69      | 0.84                         | 0.09                                     | -0.39          | 0.24           |
| U  | 0.2199540 | 0.69      | 0.84                         | 0.08                                     | -0.40          | 0.25           |
| Np | 0.2200157 | 0.69      | 0.84                         | 0.08                                     | -0.40          | 0.25           |
| Pu | 0.2206238 | 0.68      | 0.85                         | 0.07                                     | -0.40          | 0.25           |
| Am | 0.2210587 | 0.67      | 0.83                         | 0.07                                     | -0.41          | 0.25           |
| Cm | 0.2210846 | 0.67      | 0.83                         | 0.06                                     | -0.42          | 0.25           |
| Bk | 0.2212451 | 0.67      | 0.81                         | 0.06                                     | -0.42          | 0.26           |
| Cf | 0.2214606 | 0.66      | 0.78                         | 0.06                                     | -0.43          | 0.26           |
| Es | 0.2213519 | 0.66      | 0.75                         | 0.06                                     | -0.43          | 0.26           |
| Fm | 0.2216677 | 0.66      | 0.70                         | 0.05                                     | -0.44          | 0.26           |
| Md | 0.2220093 | 0.65      | 0.64                         | 0.05                                     | -0.45          | 0.26           |
| No | 0.2221944 | 0.64      | 0.56                         | 0.05                                     | -0.47          | 0.27           |
| Lr | 0.2221178 | 0.65      | 0.46                         | 0.05                                     | -0.49          | 0.27           |

Table A.10.:  $[\text{An}^{\text{III}}(\text{OH}_2)_7 \cdot \text{OH}_2]^{3+}$  ZPEs in a.u., entropies  $S^\circ$  in  $\text{kJ K}^{-1} \text{mol}^{-1}$ , mean  $\text{An}^{\text{III}}$ , O, H Mulliken net charges  $q_{\text{An}^{\text{III}}}$ ,  $q_{\text{O}}$ ,  $q_{\text{H}}$ , and  $\text{An}^{\text{III}}$  5f Mulliken populations  $n_{\text{An}^{\text{III}}}^{5\text{f}}$ . O and H Mulliken net charges given refer to the 1<sup>st</sup> hydration sphere  $\text{OH}_2$  ligands that coordinate the single 2<sup>nd</sup> hydration sphere  $\text{OH}_2$  ligand.

|    | ZPE       | $S^\circ$ | $q_{\text{An}^{\text{III}}}$ | $n_{\text{An}^{\text{III}}}^{5\text{f}}$ | $q_{\text{O}}$ | $q_{\text{H}}$ |
|----|-----------|-----------|------------------------------|------------------------------------------|----------------|----------------|
| Ac | 0.1961511 | 0.66      | 1.97                         | 0.14                                     | -0.33          | 0.25           |
| Th | 0.1962431 | 0.65      | 1.96                         | 0.11                                     | -0.34          | 0.26           |
| Pa | 0.1964863 | 0.65      | 1.95                         | 0.10                                     | -0.34          | 0.26           |
| U  | 0.1965906 | 0.64      | 1.94                         | 0.08                                     | -0.35          | 0.26           |
| Np | 0.1967915 | 0.64      | 1.95                         | 0.08                                     | -0.35          | 0.26           |
| Pu | 0.1968881 | 0.64      | 1.95                         | 0.08                                     | -0.35          | 0.27           |
| Am | 0.1971415 | 0.63      | 2.00                         | 0.07                                     | -0.37          | 0.27           |
| Cm | 0.1972491 | 0.63      | 2.00                         | 0.06                                     | -0.38          | 0.28           |
| Bk | 0.1973940 | 0.62      | 2.02                         | 0.06                                     | -0.39          | 0.28           |
| Cf | 0.1976388 | 0.62      | 2.04                         | 0.06                                     | -0.40          | 0.28           |
| Es | 0.1977064 | 0.62      | 2.06                         | 0.06                                     | -0.40          | 0.28           |
| Fm | 0.1978401 | 0.62      | 2.09                         | 0.05                                     | -0.41          | 0.29           |
| Md | 0.1979855 | 0.61      | 2.12                         | 0.05                                     | -0.42          | 0.29           |
| No | 0.1980935 | 0.61      | 2.16                         | 0.05                                     | -0.43          | 0.29           |
| Lr | 0.1982053 | 0.61      | 2.19                         | 0.05                                     | -0.43          | 0.30           |

Table A.11.:  $[\text{An}^{\text{III}}(\text{OH}_2)_8 \cdot \text{OH}_2]^{3+}$  ZPEs in a.u., entropies  $S^\circ$  in  $\text{kJ K}^{-1} \text{mol}^{-1}$ , mean  $\text{An}^{\text{III}}$ , O, H Mulliken net charges  $q_{\text{An}^{\text{III}}}$ ,  $q_{\text{O}}$ ,  $q_{\text{H}}$ , and  $\text{An}^{\text{III}}$  5f Mulliken populations  $n_{\text{An}^{\text{III}}}^{5\text{f}}$ . O and H Mulliken net charges given refer to the 1<sup>st</sup> hydration sphere  $\text{OH}_2$  ligands that coordinate the single 2<sup>nd</sup> hydration sphere  $\text{OH}_2$  ligand.

|    | ZPE       | $S^\circ$ | $q_{\text{An}^{\text{III}}}$ | $n_{\text{An}^{\text{III}}}^{5\text{f}}$ | $q_{\text{O}}$ | $q_{\text{H}}$ |
|----|-----------|-----------|------------------------------|------------------------------------------|----------------|----------------|
| Ac | 0.2206256 | 0.72      | 2.06                         | 0.14                                     | -0.37          | 0.26           |
| Th | 0.2209147 | 0.72      | 2.05                         | 0.11                                     | -0.37          | 0.27           |
| Pa | 0.2210555 | 0.71      | 2.03                         | 0.10                                     | -0.38          | 0.27           |
| U  | 0.2212424 | 0.71      | 2.03                         | 0.09                                     | -0.38          | 0.27           |
| Np | 0.2214455 | 0.70      | 2.03                         | 0.08                                     | -0.39          | 0.28           |
| Pu | 0.2217663 | 0.68      | 2.04                         | 0.07                                     | -0.40          | 0.28           |
| Am | 0.2220872 | 0.67      | 2.05                         | 0.07                                     | -0.41          | 0.28           |
| Cm | 0.2219589 | 0.69      | 2.07                         | 0.06                                     | -0.41          | 0.28           |
| Bk | 0.2220506 | 0.69      | 2.10                         | 0.06                                     | -0.42          | 0.29           |
| Cf | 0.2222724 | 0.69      | 2.14                         | 0.06                                     | -0.42          | 0.29           |
| Es | 0.2223784 | 0.68      | 2.17                         | 0.06                                     | -0.43          | 0.29           |
| Fm | 0.2225145 | 0.68      | 2.22                         | 0.05                                     | -0.43          | 0.29           |
| Md | 0.2230010 | 0.66      | 2.29                         | 0.05                                     | -0.45          | 0.30           |
| No | 0.2231152 | 0.65      | 2.35                         | 0.05                                     | -0.45          | 0.30           |
| Lr | 0.2228761 | 0.67      | 2.43                         | 0.05                                     | -0.46          | 0.30           |
